# Supplementary material for: NiO-decorated mesoporous TiO2 flowers for an improved photovoltaic dye sensitized solar cell
Source: Royal Society of Chemistry journal article supplement (doi:10.1039/c4cp04918g), 2015-01-01
Supplement: c4cp04918g1.pdf [file c4cp04918g1.pdf]

## Supporting Information

### **NiO-decorated mesoporous TiO<sub>2</sub> flowers for improved photovoltaic dye sensitized solar cell**

Jian Zhi , Angran Chen, Houlei Cui, Yian Xie and Fuqiang Huang\*

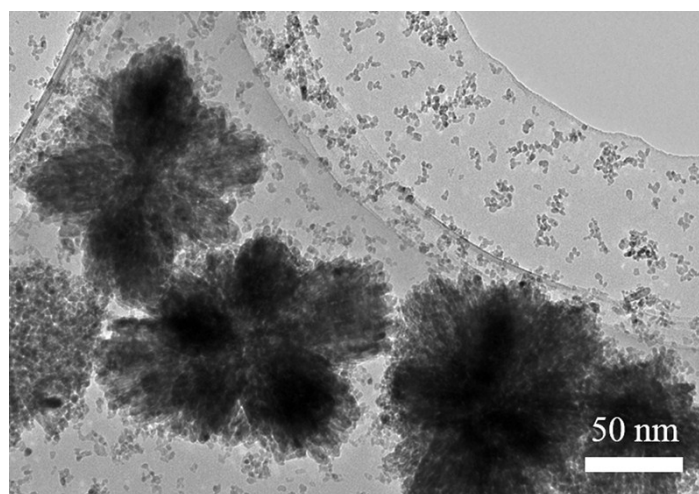

**Figure S1.** TEM image of pristine F-TiO<sub>2</sub> NPs

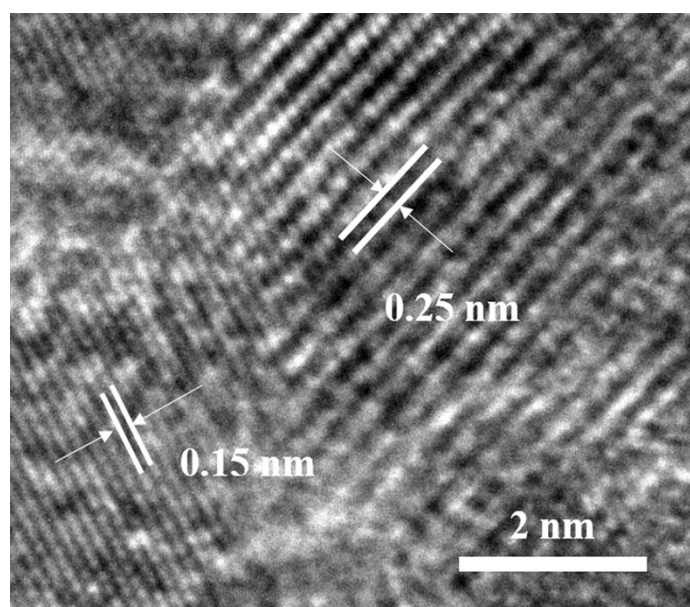

**Figure S2.** HR-TEM image of F-TiO<sub>2</sub>-NiO NPs

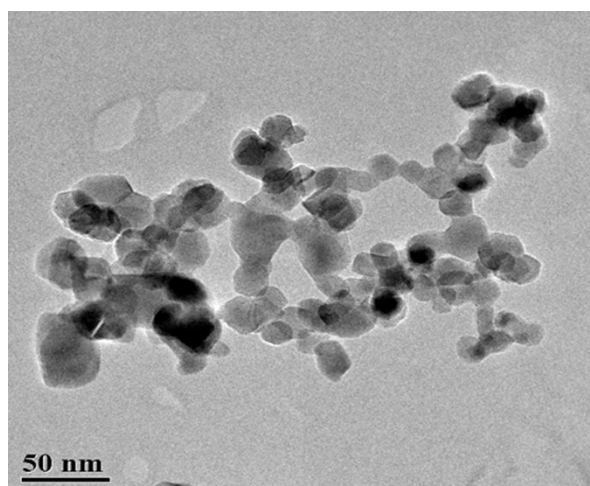

**Figure S3.** TEM images of P25 NPs

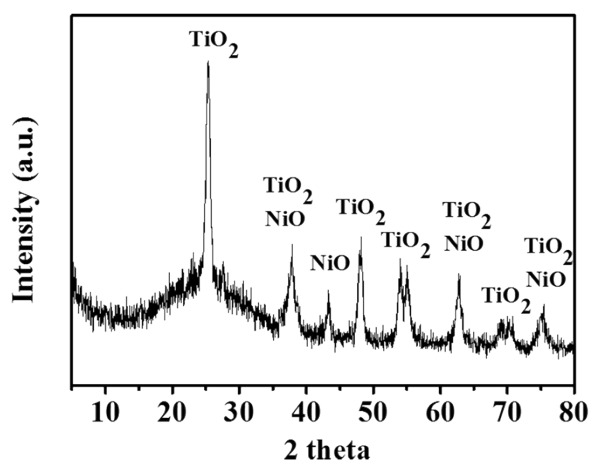

**Figure S4.** XRD patterns of F-TiO<sub>2</sub>-NiO NPs.

**Table S1.** The Photovoltaic and electron transport properties of the TiO<sub>2</sub>-NiO NFs,

TiO<sub>2</sub> NFs and P25 NPs DSSCs

| DSSc                      | V <sub>oc</sub> (V) | J <sub>sc</sub> (mA cm <sup>-2</sup> ) | F.F. | η(%) | Dye uptake (mol <sup>-8</sup> cm <sup>-2</sup> ) | R <sub>t</sub> (Ω) | R <sub>rec</sub> (Ω) | L <sub>n</sub> (μm) | Film thickness |
|---------------------------|---------------------|----------------------------------------|------|------|--------------------------------------------------|--------------------|----------------------|---------------------|----------------|
| TiO <sub>2</sub> -NiO NFs | 0.66                | 16.93                                  | 0.74 | 8.20 | 19.43                                            | 2.13               | 18.21                | 29.23               | 10 μm          |
| TiO <sub>2</sub> NFs      | 0.60                | 15.12                                  | 0.71 | 6.49 | 18.62                                            | 2.41               | 17.03                | 26.58               | 10 μm          |

|                |      |       |      |      |       |      |       |       |                  |
|----------------|------|-------|------|------|-------|------|-------|-------|------------------|
| <b>P25 NPs</b> | 0.57 | 13.58 | 0.70 | 5.56 | 11.54 | 2.05 | 10.73 | 22.88 | 10 $\mu\text{m}$ |
|----------------|------|-------|------|------|-------|------|-------|-------|------------------|

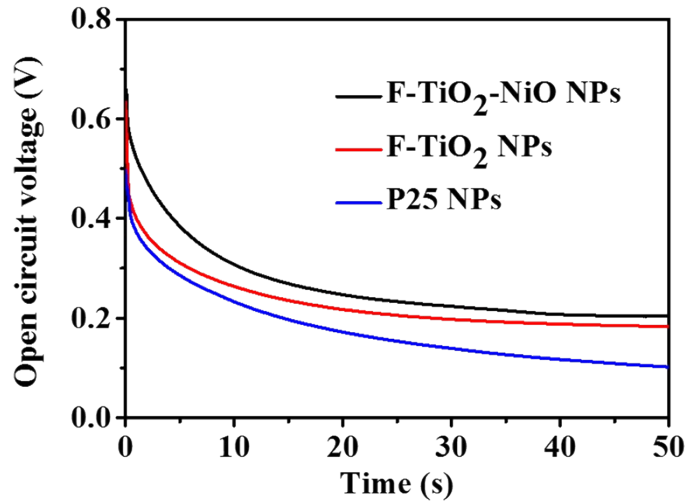

**Figure S5.** Open-circuit voltage decay profiles for DSSCs with anodes made of F-TiO<sub>2</sub>-NiO NPs, F-TiO<sub>2</sub> NPs and P25 NPs.

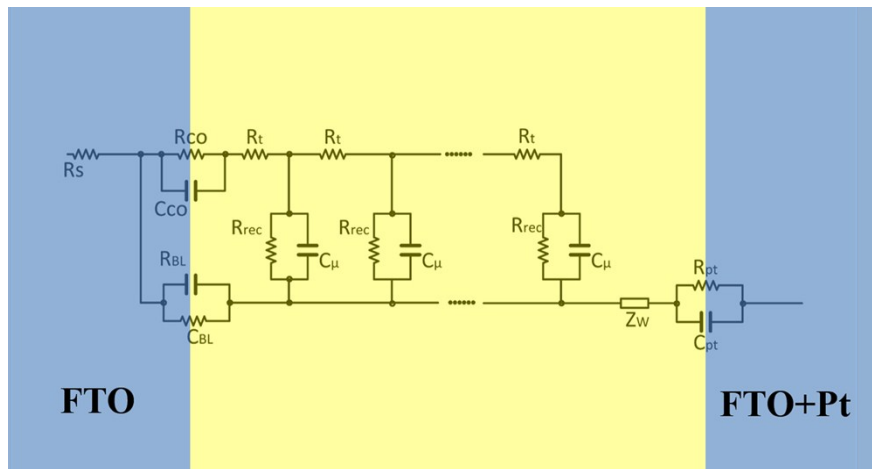

**Figure S6.** General transmission line model of DSSCs. The ( $R_{\text{rec}}$ ) is the charge recombination resistance at the TiO<sub>2</sub>/dye/electrolyte interface; ( $C_{\mu}$ ) is the chemical capacitance of the TiO<sub>2</sub> film; ( $R_t$ ) is the transport resistance of electrons in TiO<sub>2</sub> film;  $Z_W$  is the Warburg element showing the Nernst diffusion of I<sup>3-</sup> in electrolyte; ( $R_{\text{pt}}$ ) and ( $C_{\text{pt}}$ ) are the charge-transfer resistance and double-layer capacitance at the platinized counter electrode; ( $R_{\text{BL}}$ ) and ( $C_{\text{BL}}$ ) are the charge-transfer resistance and the corresponding double-layer capacitance at exposed FTO/electrolyte interface; ( $R_{\text{CO}}$ ) and ( $C_{\text{CO}}$ ) are the resistance and the capacitance at FTO/TiO<sub>2</sub> contact;  $R_s$  is the series

resistance, including the sheet resistance of FTO glass and contact resistance of the cell.
